# Supplementary material for: Prognostication in comatose survivors of cardiac arrest: An advisory statement from the European Resuscitation Council and the European Society of Intensive Care Medicine
Source: Springer Nature journal article supplement (doi:10.1007/s00134-014-3470-x), 2014-11-14
Supplement: MOESM3 [file 8123502]

**Prognostication in comatose survivors of cardiac arrest. An Advisory Statement from the European Resuscitation Council and the European Society of Intensive Care Medicine**

*Intensive Care Medicine, 2014.*

Claudio Sandroni, Alain Cariou, Fabio Cavallaro, Tobias Cronberg, Hans Friberg, Cornelia Hoedemaekers, Janneke Horn, Jerry P. Nolan, Andrea O. Rossetti and Jasmeet Soar

Corresponding author:

Claudio Sandroni

Department of Anaesthesiology and Intensive Care

Catholic University School of Medicine,

Largo Gemelli, 8 - 00168 Rome, Italy

sandroni@rm.unicatt.it

## ESM Appendix 4 – Definitions and characteristics of status myoclonus.

|  | **Author, year** | **Name (no. of patients)** | **Definition** | **Distribution** | **EEG (no. of patients) (1)** |
| --- | --- | --- | --- | --- | --- |
| **NOT treated with TH** | Hui, 2005 | Myoclonus status epilepticus (MSE) (8) | Clinical evidence of continuous myoclonic seizure activity lasting 30 min or more | Generalised | Periodic spikes or polyspikes; low-voltage diffuse slow activity |
| Krumholz, 1988 | Status myoclonus (7) | Myoclonus persisting for ≥30 minutes. | Segmental, axial (palate, pharynx, eyelids) | Not reported |
| Myoclonic status epilepticus (MSE) (19) | Epileptic seizures and myoclonus occurring together and persisting for over 30 minutes | Not reported | Epileptiform discharges (15/19) |
| Burst-suppression (13/19) |
| Wijdicks, 1993 | Myoclonus status (40) | Spontaneous or sound-sensitive, repetitive irregular brief jerks in both face and limbs | Generalized | Burst-suppression (33) |
| Polyspikes (3) |
| Alpha-coma (3) |
| Diffuse slowing (1) |
| Young, 1990 | Myoclonic status epilepticus (MSE) or generalised status myoclonicus (11) | Generalised, bilaterally synchronous myoclonic twitches occurring repetitively for at least 30 minutes | Bilaterally synchronous | Burst-suppression (5/10) |
| Suppression (4/10) |
| Alpha coma (2(10) |
| Zandbergen, 2006 | Myoclonus status (16) | Not defined | Not reported | Not reported |
|  |  |  |  |  |  |
| **TREATED with TH** | Al Thenayan, 2009 | Myoclonus status epilepticus (MSE) (8) | Not defined. Probably based on the AAN 2006 Review (2) | Not reported | Not reported |
| Bouwes, 2012 | Status myoclonus (32) | Not defined | Not reported | Status epilepticus (SE) (8) |
| Epileptiform, non-SE (4) |
| Burst-suppression (2) |
| Low-amplitude (2) |
| Rittenberger, 2012 | Myoclonic status epilepticus (MSE) (21) | >30 min of myoclonic jerks time-locked with bursts of a burst-suppression or associated with GPEDs | Face and/or limbs and/or axial musculature | Burst-suppression or GPEDs |
| Samaniego, 2011 | Status myoclonus (2) | Based on the AAN 2006 Review (2) | Multifocal, generalised, involving face, limbs and axial musculature | Not reported |

(1) EEG data are incompletely reported in some studies.

(2) Spontaneous, repetitive, unrelenting, generalized, multifocal myoclonus involving the face, limbs, and axial musculature in the presence of coma.

GPEDs: generalised periodical epileptiform discharges.
